# Supplementary material
Source: publisher figshare collection journal article supplement (https://geolsoc.figshare.com/ndownloader/files/14358530)
Supplement: Supplementary file 1 [file 14358530]

## Sheet: Sheet1
Table S16 Sandstone chemistry ch. 10 Little Ben Fm. ICP-MS
Sample name	NZ13-68	NZ13-69	NZ13-70	NZ13-178	NZ13-180	NZ13-181	NZ13-182	NZ13-186	NZ13-187	NZ13-404	N13 406	N14-168
Rock type	med. Sandstone	med. Sandstone	med. Sandstone	med. Sandstone	med. Sandstone	med. Sandstone	med. Sandstone	med. Sandstone	med. Sandstone	med. Sandstone	med. Sandstone	coarse sandstone
Region	West Dome, Southland	West Dome, Southland	West Dome, Southland	Key summit, Alpine area	Key summit, Alpine area	Key summit, Alpine area	Key summit, Alpine area	Key summit, Alpine area	Key summit, Alpine area	Wairoa River, north area	Wairo River, north area	Mount Mistake, Southland
GPS	S45 60586 E168 23512	S45 60752 E168 23197	S45 60836 E168 24033	S44 81670 E168 11934	S44 81544 E168 12024	S44 81544 E168 12024	S44 81425 E168 12154	S44 83172 E168 12668	S44 85172 E168 12530	S41 49547 E173 08385	S41 00947 E173 79512	E22 28126 N54 48173
Ba	85	130	70	65	57	43	48	152	183	201	199	292
Be	1	1	1	1	2	1	1	1	3	5	1	4
Co	18.3	22.8	31.4	34.7	36.5	34.6	37.4	41.2	21.5	48.4	28.3	19.7
Cs	0.7	1.2	0.2	0.6	0.5	0.2	0.4	1.7	1.5	1.9	6.3	0.9
Ga	18.6	14.9	19.4	17.3	18.8	18.3	17.3	19.4	17.8	17.6	19.2	14.2
Hf	1.8	2.4	1.8	2.6	2.2	2.2	2	2.7	3.5	3.5	2.8	1.7
Nb	1.9	2.2	2.1	2.5	2.5	2.3	1.9	2.8	5.1	3.3	4.5	2.2
Rb	9.2	18.2	4.3	10.8	9.7	4.4	5.5	23.1	31.1	4.2	43.6	24.5
Sn	1	2	1	1	1	1	1	1	2	1	1	1
Sr	262.2	304.4	146.4	263.3	462.3	342.8	1042.8	234.7	159.5	166.4	375.4	723
Ta	0.2	1.4	0.9	1.1	0.9	0.8	1.3	1.1	0.6	0.8	1.4	0.2
Th	1	1.7	0.7	1.4	1.3	1.5	1.5	1.6	6.1	0.2	2.4	1.8
U	0.4	0.8	0.2	0.4	0.3	0.4	0.4	0.5	1.6	0.2	0.9	0.5
V	290	162	285	272	327	284	248	268	182	407	253	134
W	12.2	93.7	58.1	69.9	77.2	60.3	113.3	82.6	46.6	50.6	96.8	11.3
Zr	71.1	83.6	66.7	85.4	84.7	83.9	76.2	90.7	132.7	131.9	116.3	63.7
Y	19.5	14.2	15.7	18	17.4	18.9	16.6	19.5	24.1	41.4	26	15.2
La	5.5	6.8	5.9	7.5	8	7.9	7.3	13.3	18	4.4	11.2	7.1
Ce	13.1	18.6	14.8	16.4	19.5	16.7	17.8	29.1	40.9	13.6	27.1	14.1
Pr	1.96	2.31	2.02	2.4	2.58	2.5	2.32	3.78	5.32	2.23	3.33	2
Nd	9.9	9.8	10	11.2	12.4	12.7	11	17.2	21	13	15.6	9.3
Sm	2.95	2.31	2.48	2.87	3	3.22	2.9	4.24	5.03	4.27	4.01	2.13
Eu	0.9	0.7	0.91	0.99	1.06	1.05	0.94	1.42	1.21	1.42	1.18	0.7
Gd	3.54	2.57	2.9	3.19	3.68	3.44	3.15	4.27	5.14	5.95	4.52	2.72
Tb	0.6	0.45	0.48	0.55	0.59	0.59	0.52	0.67	0.83	1.13	0.69	0.45
Dy	3.57	2.97	3.05	3.29	3.56	3.76	2.95	4.1	5.33	7.58	4.61	2.78
Ho	0.8	0.55	0.65	0.74	0.74	0.68	0.64	0.72	1.03	1.57	0.92	0.58
Er	2.21	1.63	1.84	2.12	2.19	2.24	2.05	2.45	3.18	4.53	2.7	1.81
Tm	0.31	0.25	0.28	0.31	0.32	0.31	0.26	0.33	0.45	0.71	0.42	0.25
Yb	2.21	1.55	1.65	2.02	1.96	1.82	1.94	2.12	2.87	4.36	2.58	1.71
Lu	0.33	0.23	0.27	0.29	0.31	0.29	0.29	0.34	0.49	0.72	0.38	0.26
Eu/Eu*	0.851549	0.878426	1.03752	1.00041	0.975441	0.964633	0.950941	1.0204	0.727612	0.861382	0.847462	0.889209
Th/U	2.5	2.125	3.5	3.5	4.33333	3.75	3.75	3.2	3.8125	1	2.66667	3.6
